# Supplementary material for: Constructing covalent organic nanoarchitectures molecule by molecule via scanning probe manipulation
Source: Nat Chem. 2021 Sep 2;13(11):1133–9. doi: 10.1038/s41557-021-00773-4 (PMC8550974; doi:10.1038/s41557-021-00773-4)
Supplement: Supplementary file 20 [file 41557_2021_773_MOESM19_ESM.mol]

nchem.21020316B-compTPradical.mol
  ChemDraw07132114412D

 34 41  0  0  0  0  0  0  0  0999 V2000
   -4.1250    1.4300    0.0000 C   0  0  0  0  0  0  0  0  0  0  0  0
   -4.5378    0.7156    0.0000 C   0  0  0  0  0  0  0  0  0  0  0  0
   -4.1256    0.0010    0.0000 C   0  0  0  0  0  0  0  0  0  0  0  0
   -3.3006    0.0007    0.0000 C   0  0  0  0  0  0  0  0  0  0  0  0
   -2.8878    0.7150    0.0000 C   0  0  0  0  0  0  0  0  0  0  0  0
   -3.3000    1.4296    0.0000 C   0  0  0  0  0  0  0  0  0  0  0  0
   -2.8883   -0.7139    0.0000 C   0  0  0  0  0  0  0  0  0  0  0  0
   -2.0633   -0.7142    0.0000 C   0  0  0  0  0  0  0  0  0  0  0  0
   -1.6506    0.0001    0.0000 C   0  0  0  0  0  0  0  0  0  0  0  0
   -2.0628    0.7147    0.0000 C   0  0  0  0  0  0  0  0  0  0  0  0
   -3.3011   -1.4282    0.0000 C   0  0  0  0  0  0  0  0  0  0  0  0
   -2.8889   -2.1429    0.0000 C   0  0  0  0  0  0  0  0  0  0  0  0
   -2.0639   -2.1432    0.0000 C   0  0  0  0  0  0  0  0  0  0  0  0
   -1.6511   -1.4289    0.0000 C   0  0  0  0  0  0  0  0  0  0  0  0
   -0.8256   -0.0002    0.0000 C   0  0  0  0  0  0  0  0  0  0  0  0
   -0.4128    0.7141    0.0000 C   0  0  0  0  0  0  0  0  0  0  0  0
   -0.8250    1.4287    0.0000 C   0  0  0  0  0  0  0  0  0  0  0  0
   -1.6500    1.4290    0.0000 C   0  0  0  0  0  0  0  0  0  0  0  0
    0.4122    0.7138    0.0000 C   0  0  0  0  0  0  0  0  0  0  0  0
    0.8243   -0.0009    0.0000 C   0  0  0  0  0  0  0  0  0  0  0  0
    1.6493   -0.0009    0.0000 C   0  0  0  0  0  0  0  0  0  0  0  0
    2.0622    0.7138    0.0000 C   0  0  0  0  0  0  0  0  0  0  0  0
    1.6493    1.4285    0.0000 C   0  0  0  0  0  0  0  0  0  0  0  0
    0.8243    1.4285    0.0000 C   0  0  0  0  0  0  0  0  0  0  0  0
    2.8876    0.7138    0.0000 C   0  0  0  0  0  0  0  0  0  0  0  0
    3.3001    1.4285    0.0000 C   0  0  0  0  0  0  0  0  0  0  0  0
    2.8876    2.1432    0.0000 C   0  0  0  0  0  0  0  0  0  0  0  0
    2.0622    2.1432    0.0000 C   0  0  0  0  0  0  0  0  0  0  0  0
    2.0622   -0.7159    0.0000 C   0  0  0  0  0  0  0  0  0  0  0  0
    2.8876   -0.7159    0.0000 C   0  0  0  0  0  0  0  0  0  0  0  0
    3.3005   -0.0009    0.0000 C   0  0  0  0  0  0  0  0  0  0  0  0
    4.1253   -0.0008    0.0000 C   0  0  0  0  0  0  0  0  0  0  0  0
    4.5378    0.7138    0.0000 C   0  4  0  0  0  0  0  0  0  0  0  0
    4.1253    1.4285    0.0000 C   0  0  0  0  0  0  0  0  0  0  0  0
  1  2  2  0      
  2  3  1  0      
  3  4  2  0      
  4  5  1  0      
  5  6  2  0      
  6  1  1  0      
  4  7  1  0      
  7  8  2  0      
  8  9  1  0      
  9 10  2  0      
 10  5  1  0      
  7 11  1  0      
 11 12  2  0      
 12 13  1  0      
 13 14  2  0      
 14  8  1  0      
  9 15  1  0      
 15 16  2  0      
 16 17  1  0      
 17 18  2  0      
 18 10  1  0      
 16 19  1  0      
 19 20  2  0      
 20 21  1  0      
 21 22  2  0      
 22 23  1  0      
 23 24  2  0      
 24 19  1  0      
 22 25  1  0      
 25 26  2  0      
 26 27  1  0      
 27 28  2  0      
 28 23  1  0      
 21 29  1  0      
 29 30  2  0      
 30 31  1  0      
 31 25  1  0      
 31 32  2  0      
 32 33  1  0      
 33 34  2  0      
 34 26  1  0      
M  RAD  1  33   2
M  END
